# Supplementary material
Source: PubMed Central journal article supplement (PMC5154610)
Supplement: pr6b00717_si_001.pdf [file pr6b00717_si_001.pdf]

## **Supporting Information**

### **Photosensitized UVA-induced crosslinking between human DNA repair and replication proteins and DNA revealed by proteomic analysis**

**Melisa Guven, Karin Barnouin, Ambrosius P. Snijders & Peter Karran**

#### **Table of Contents**

**Supplementary Figure S1:** Protease dependence of DNA recovery & ROS analysis by FACS

**Supplementary Figure S2:** Log<sub>2</sub> SILAC distributions for different treatment conditions

**Supplementary Figure S3:** Crosslinking profiles for DNA polymerase  $\delta$ , MCM proteins & topoisomerases

**Supplementary Figure S4:** Heat map for ciprofloxacin+UVA crosslinked proteins & identity of false positives

**Supplementary Table S1:** DNA repair proteins most vulnerable to crosslinking by 6-TG+UVA or ciprofloxacin+UVA.
