# Supplementary material
Source: PubMed Central journal article supplement (PMC5154610)
Supplement: pr6b00717_si_002.pdf [file pr6b00717_si_002.pdf]

# Supplementary Figure S1

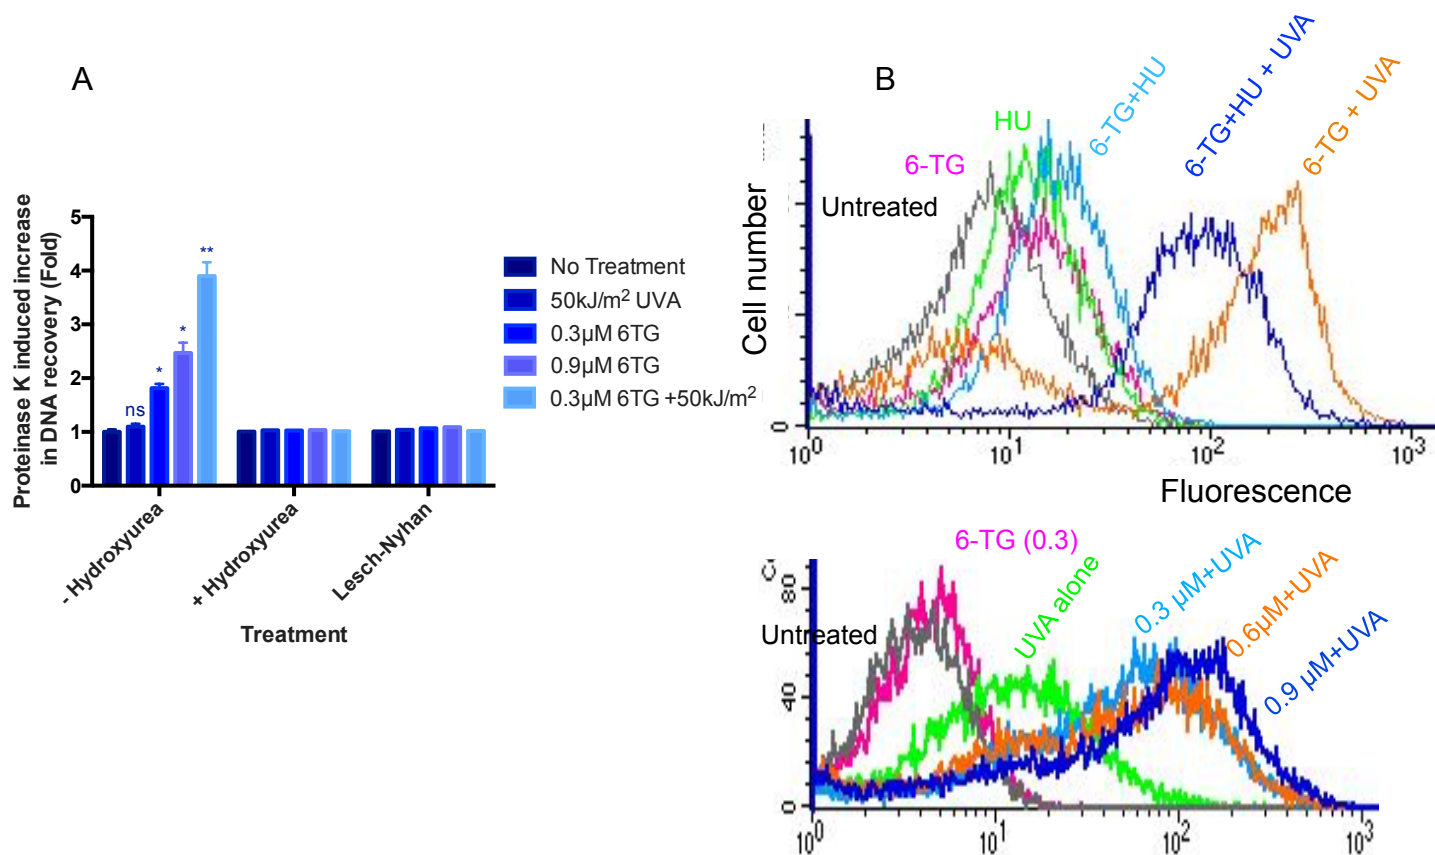

**A** Protease-dependent DNA recovery. CCRF-CEM or GM03467 Lesch-Nyhan cells treated with 6-TG and UVA as indicated were divided into two aliquots. DNA was extracted by the Wizard genomic purification kit (Promega). In one set of extractions, a proteinase K digestion step was included prior to DNA precipitation.

Effect of hydroxyurea. CCRF-CEM cells that had been treated with 3 mM HU for 6 h were grown for a further 24 h in 6-TG in the continued presence of HU and UVA irradiated as indicated. DNA was extracted by the Wizard genomic purification kit with or without proteinase K digestion prior to DNA precipitation. HPLC measurements confirmed that DNA 6-TG incorporation in HU treated cells was < 0.001% DNA G.

Data are expressed as the fold increase in DNA recovery resulting from proteinase K digestion. Means from three separate experiments.

Paired t-test analysis, p-values, : UVA ns 0.1359;

0.3 μM 6-TG \* 0.0196;

0.9 μM 6-TG \* 0.0248;

0.3μM 6-TG+UVA \*\* 0.0076.

**B** FACS analysis of ROS. CCRF-CEM cells treated HU (6 mM, 3 h) followed by 6-TG (0, 0.9 μM for 24 h) (Upper panel) in the continued presence of HU as indicated or 0, 0.3, 0.6 or 0.9 μM 6-TG as indicated (Lower panel) were irradiated with UVA (50 kJ/m<sup>2</sup>). ROS were determined by CM-H<sub>2</sub>DCFDA staining and FACS.

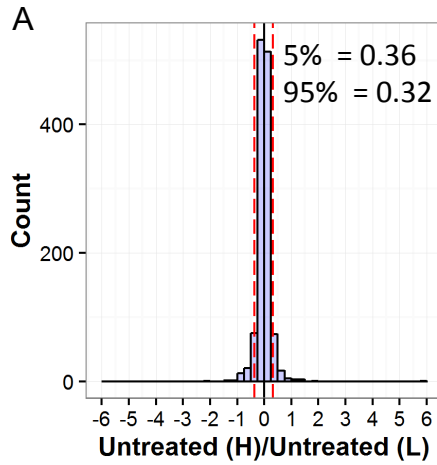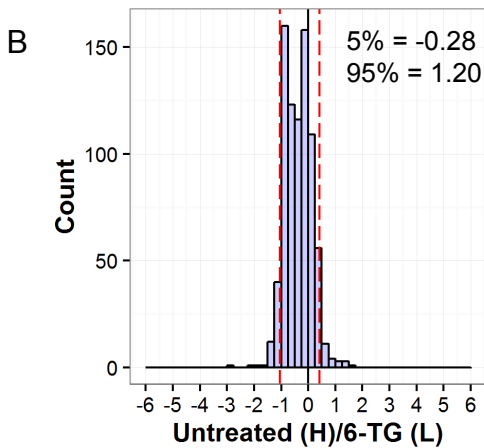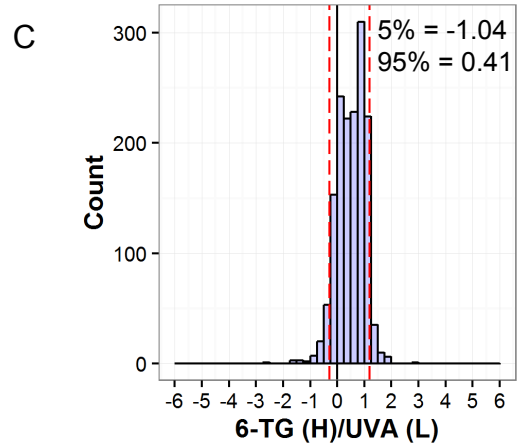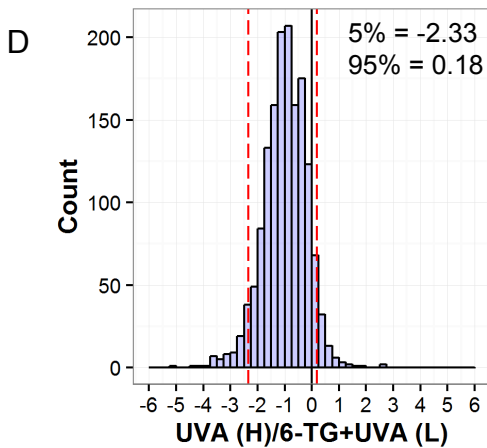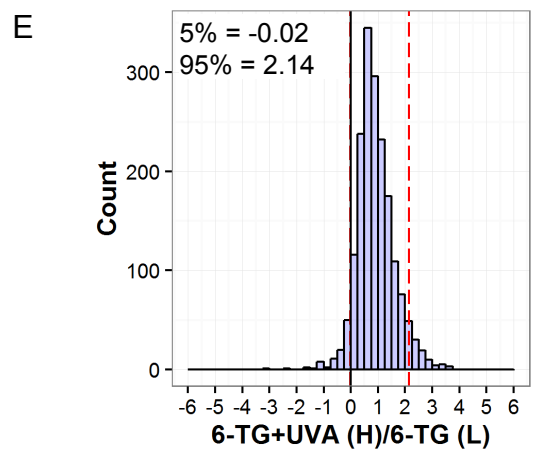

Analysis of HyBond N+ bound chromatin proteins from CCRF-CEM cells. Perseus derived log<sub>2</sub> SILAC H:L ratio *versus* frequency count histograms for mixes of heavy (H) and light (L) labelled cells that had received the treatments shown.

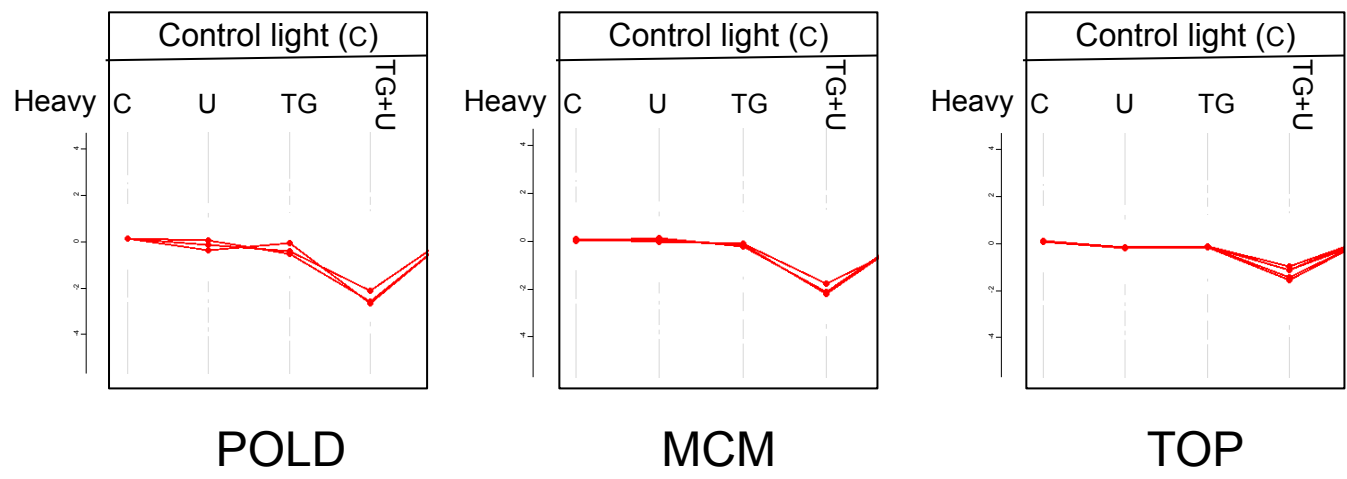

Loss of DNA polymerase delta subunits from extracts prepared from 6-TG+UVA treated cells.

Crosslinking plot displaying the log2 SILAC H:L ratios for POLD1-3, MCM2-7 and the topoisomerases for the comparisons indicated. The shape of the profile (red) indicates treatment-induced protein losses.

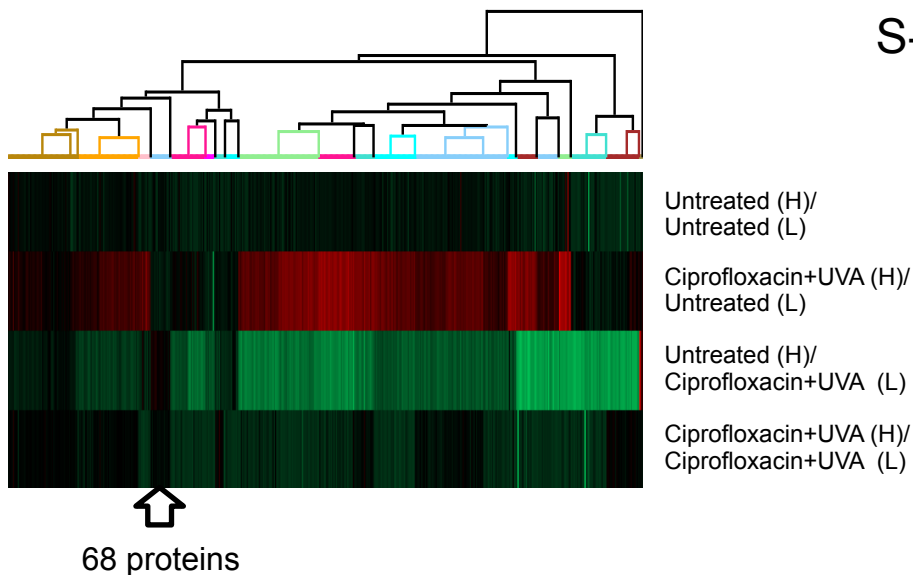

| Treatment                                             | Protein names                                                                                                                                            | Gene names                                                                                 |             |
|-------------------------------------------------------|----------------------------------------------------------------------------------------------------------------------------------------------------------|--------------------------------------------------------------------------------------------|-------------|
| 6-Thioguanine+UVA                                     | Histone H2A.x                                                                                                                                            | H2AFX                                                                                      |             |
|                                                       | Core histone macro-H2A.1;Histone H2A                                                                                                                     | H2AFY                                                                                      |             |
|                                                       | Histone H2A.Z;Histone H2A.V;Histone H2A                                                                                                                  | H2AFZ;H2AFV                                                                                |             |
|                                                       | Histone H2A type 1-B/E;Histone H2A;Histone H2A type 3                                                                                                    | HIST1H2AB;HIST3H2A                                                                         |             |
|                                                       | Histone H2A type 1-D;Histone H2A                                                                                                                         | HIST1H2AD                                                                                  |             |
|                                                       | Histone H2A;<br>Histone H2A type 1;<br>Histone H2A type 1-H;<br>Histone H2A type 2-A;<br>Histone H2A type 1-J;<br>Histone H2A.J;<br>Histone H2A type 2-C | HIST1H2AK;<br>HIST1H2AG;<br>HIST1H2AH;<br>HIST2H2AA3;<br>HIST1H2AJ;<br>H2AFJ;<br>HIST2H2AC |             |
|                                                       | Histone H2B type 1-D;Histone H2B                                                                                                                         | HIST1H2BD                                                                                  |             |
|                                                       | Histone H2B;Histone H2B type 1-C/E/F/G/I                                                                                                                 | HIST1H2BF;HIST1H2BC                                                                        |             |
|                                                       | Histone H2B type 1-K                                                                                                                                     | HIST1H2BK                                                                                  |             |
|                                                       | Histone H2B type 1-L                                                                                                                                     | HIST1H2BL                                                                                  |             |
|                                                       | Histone H2B type 1-M                                                                                                                                     | HIST1H2BM                                                                                  |             |
|                                                       | Histone H2B type 1-N                                                                                                                                     | HIST1H2BN                                                                                  |             |
|                                                       | Histone H2B type 1-O                                                                                                                                     | HIST1H2BO                                                                                  |             |
|                                                       | Histone H2A type 2-B                                                                                                                                     | HIST2H2AB                                                                                  |             |
|                                                       | Histone H2B type 2-F;Histone H2B type 1-H;Histone H2B                                                                                                    | HIST2H2BF;HIST1H2BH                                                                        |             |
|                                                       | Ciprofloxacin+UVA                                                                                                                                        | Histone H2A.x                                                                              | H2AFX       |
|                                                       |                                                                                                                                                          | Core histone macro-H2A.1;Histone H2A                                                       | H2AFY       |
|                                                       |                                                                                                                                                          | Histone H2A.Z;Histone H2A.V;Histone H2A                                                    | H2AFZ;H2AFV |
| Histone deacetylase 3                                 |                                                                                                                                                          | HDAC3                                                                                      |             |
| Histone H2A type 1-C                                  |                                                                                                                                                          | HIST1H2AC                                                                                  |             |
| Histone H2B type 1-B                                  |                                                                                                                                                          | HIST1H2BB                                                                                  |             |
| Histone H2B type 1-D;Histone H2B                      |                                                                                                                                                          | HIST1H2BD                                                                                  |             |
| Histone H2B type 1-K                                  |                                                                                                                                                          | HIST1H2BK                                                                                  |             |
| Histone H2B type 1-L                                  |                                                                                                                                                          | HIST1H2BL                                                                                  |             |
| Histone H2B type 1-M                                  |                                                                                                                                                          | HIST1H2BM                                                                                  |             |
| Histone H2B type 1-N                                  |                                                                                                                                                          | HIST1H2BN                                                                                  |             |
| Histone H3.1;Histone H3;Histone H3.1t;Histone H3.3C   |                                                                                                                                                          | HIST1H3A;HIST3H3;H3F3C;H3F3A                                                               |             |
| Histone H4                                            |                                                                                                                                                          | HIST1H4L;HIST1H4A;HIST1H4H                                                                 |             |
| Histone H2A type 2-A;Histone H2A type 2-C             |                                                                                                                                                          | HIST2H2AA3;HIST2H2AC                                                                       |             |
| Histone H2A type 2-B                                  |                                                                                                                                                          | HIST2H2AB                                                                                  |             |
| Histone H2B type 2-F;Histone H2B type 1-H;Histone H2B |                                                                                                                                                          | HIST2H2BF;HIST1H2BH                                                                        |             |
| Histone H3.2                                          |                                                                                                                                                          | HIST2H3A                                                                                   |             |
| Histone H3                                            |                                                                                                                                                          | HIST2H3PS2                                                                                 |             |

Heat map of ciprofloxacin+UVA crosslinking. The arrow indicates possible false positives. These were confirmed by crosslink profile analysis (not shown). The table indicates that histones are highly represented among these false positives that show significant overlap with those generated during 6-TG+UVA analysis.

# Supplementary Table S1

| Protein                | 6-Thioguanine+UVA | Ciprofloxacin+UVA |
|------------------------|-------------------|-------------------|
| <b>APEX1 (APE1)</b>    | +                 | +                 |
| <b>BLM</b>             | +                 | +                 |
| <b>DDB1</b>            | +                 | +                 |
| <b>DUT</b>             | +                 | +                 |
| <b>FEN1 (DNase IV)</b> | +                 | +                 |
| <b>LIG1</b>            | +                 | +                 |
| <b>LIG3</b>            | +                 | +                 |
| <b>MRE11A</b>          | +                 | +                 |
| <b>MSH2</b>            | +                 | +                 |
| <b>MSH6</b>            | +                 | +                 |
| <b>PARP1 (ADPRT)</b>   | +                 | +                 |
| <b>PCNA</b>            | +                 | +                 |
| <b>POLD1</b>           | +                 | +                 |
| <b>POLD3</b>           | +                 | +                 |
| <b>POLE3</b>           | +                 | +                 |
| <b>PRPF19 (PSO4)</b>   | +                 | +                 |
| <b>RAD50</b>           | +                 | +                 |
| <b>RECQL (RECQ1)</b>   | +                 | +                 |
| <b>RPA1</b>            | +                 | +                 |
| <b>XRCC1</b>           | +                 | +                 |
| <b>XRCC5 (Ku80)</b>    | +                 | +                 |
| <b>XRCC6 (Ku70)</b>    | +                 | +                 |
| <b>MGMT</b>            | +                 | -                 |
| <b>MMS19</b>           | +                 | -                 |
| <b>MPG</b>             | +                 | -                 |
| <b>NBN (NBS1)</b>      | +                 | -                 |
| <b>NUDT MTH1</b>       | +                 | -                 |
| <b>POLE1</b>           | +                 | -                 |
| <b>PRKDC</b>           | +                 | -                 |
| <b>UBE2N (UBC13)</b>   | +                 | -                 |
| <b>CHAF1A (CAF1)</b>   | -                 | +                 |
| <b>FANCD2</b>          | -                 | +                 |
| <b>FANCI</b>           | -                 | +                 |
| <b>MSH3</b>            | -                 | +                 |
| <b>TP53</b>            | -                 | +                 |
| <b>TP53BP1 (53BP1)</b> | -                 | +                 |
| <b>WRN</b>             | -                 | +                 |

DNA repair proteins most vulnerable to crosslinking by 6-TG+UVA and ciprofloxacin+UVA.
